# Supplementary material for: Enhanced self-powered UV photodetection from X chromosome-shaped Cs3Cu2I5microcrystals
Source: Royal Society of Chemistry journal article supplement (doi:10.1039/d3tc00668a), 2023-01-01
Supplement: d3tc00668a1.pdf [file d3tc00668a1.pdf]

## Supporting Information

### Enhanced Self-powered UV Photodetection from X Chromosome-shaped $\text{Cs}_3\text{Cu}_2\text{I}_5$ Microcrystals

Xuesong Li, Yulu Zhou\*, Fengchang Huang, Xiaoma Tao, Yifang Ouyang, Xiaoming Mo\*, and Jialong Zhao\*

Center on Nanoenergy Research, Guangxi Key Laboratory for Relativistic Astrophysics, School of Physical Science and Technology, Guangxi University, Nanning 530004, People's Republic of China

E-mail: ylzhou@gxu.edu.cn (Y. Zhou); xmmo@gxu.edu.cn (X. Mo); zhaojl@gxu.edu.cn (J. Zhao).

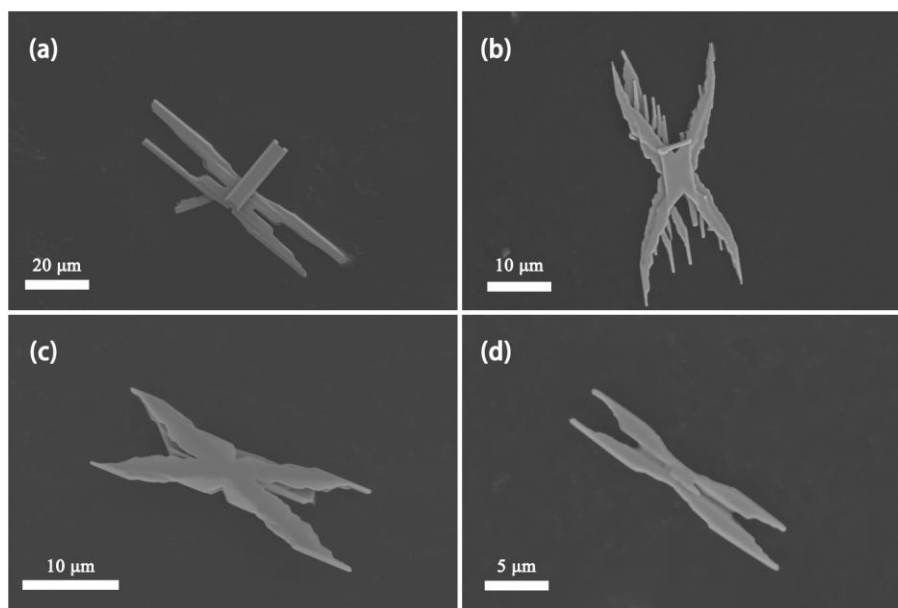

**Figure S1.** SEM images of different sizes of the X chromosome-like  $\text{Cs}_3\text{Cu}_2\text{I}_5$  MCs under different IPA dropping speed: (a) 0.2 mL/s, (b) 1 mL/s, (c) 5 mL/s, (d) 10 mL/s.

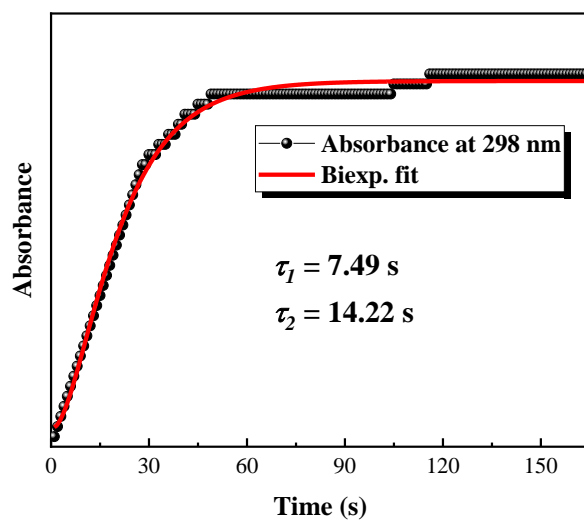

**Figure S2.** Dynamic trace at 298 nm showing the change in absorbance during the treatment of the anti-solvent IPA and its fitting curve.

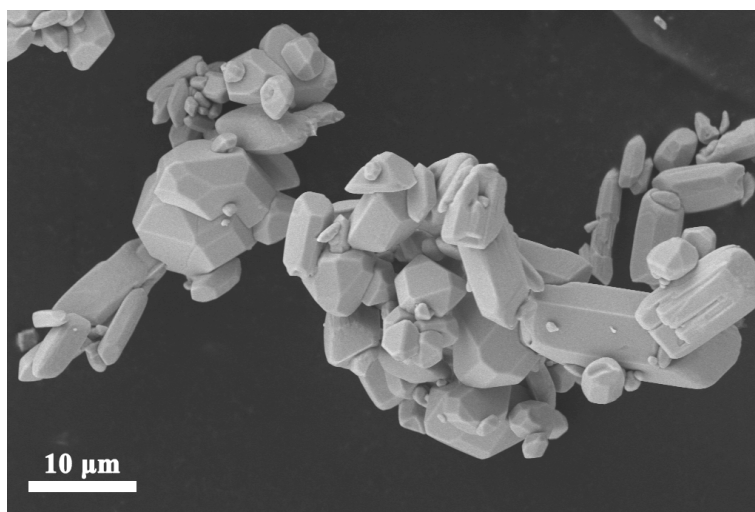

**Figure S3.** SEM image of  $\text{Cs}_3\text{Cu}_2\text{I}_5$  MCs with DMF: DMSO = 1: 0.25.

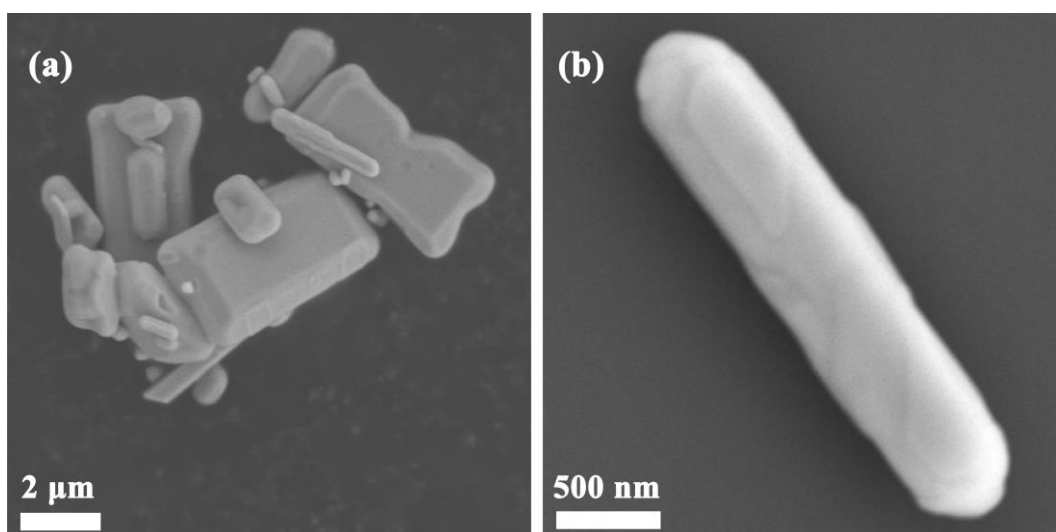

**Figure S4.** SEM images of  $\text{Cs}_3\text{Cu}_2\text{I}_5$  crystals: (a) without surfactant agent. (b) with another surfactant agent OAm.

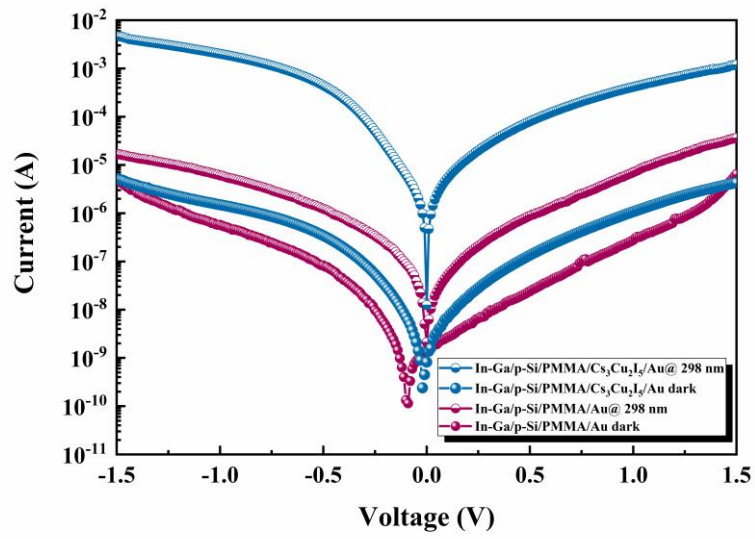

**Figure S5.** I-V curves in dark and under 298 nm UV light of In-Ga/p-Si/PMMA/Au device and In-Ga/p-Si/PMMA/Cs<sub>3</sub>Cu<sub>2</sub>I<sub>5</sub> MCs/Au PD.

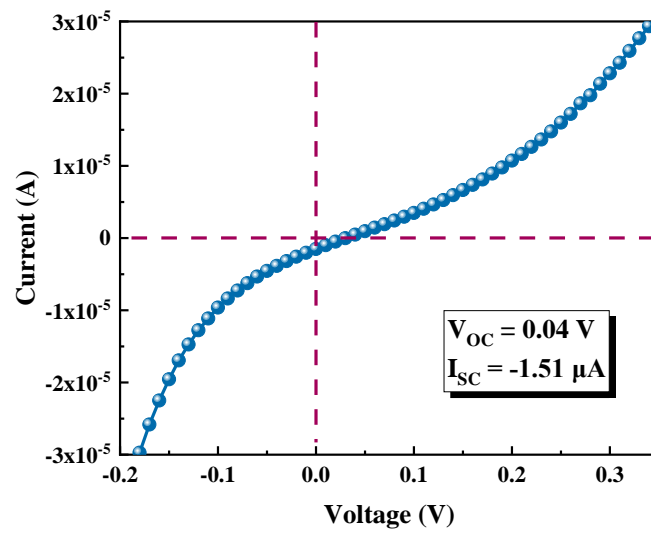

**Figure S6.** Enlarged I-V curve demonstrating the photovoltaic effect of the device.

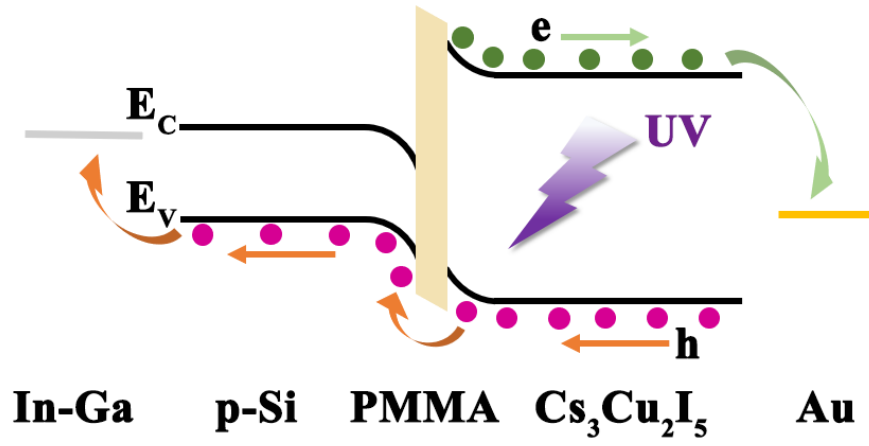

Figure S7. Energy band diagram of the heterostructure.

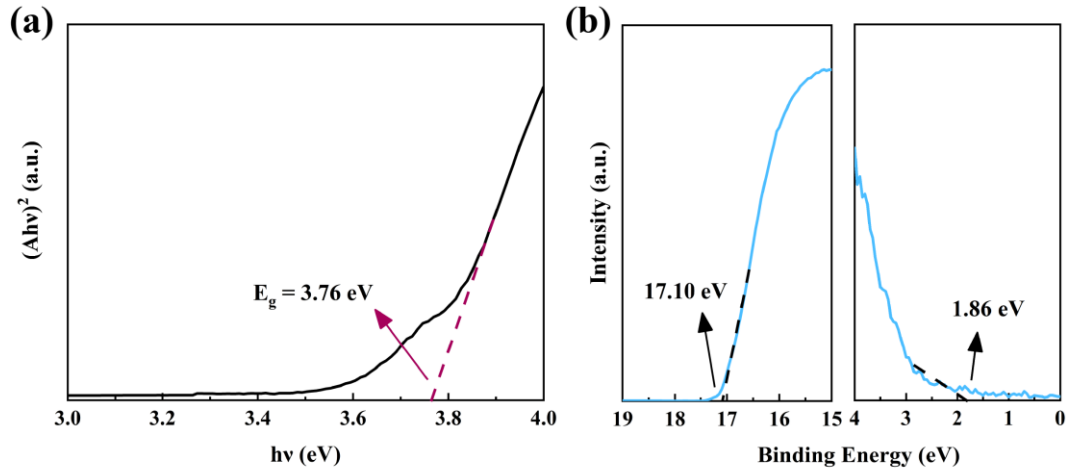

Figure S8. (a) Absorption spectra of the X chromosome-shaped  $\text{Cs}_3\text{Cu}_2\text{I}_5$  MCs. (b) UPS spectra measured by He I ( $h\nu = 21.22$  eV).  $E_F = E_{\text{cutoff1}} - h\nu = 17.10 - 21.22 = -4.12$  eV,  $E_V = E_F - E_{\text{cutoff2}} = -4.12 - 1.86 = -5.98$  eV,  $E_C = E_V + E_g = -5.98 + 3.76 = -2.22$  eV.
